# Supplementary material for: Highly selective one-step hydrogenation of nitrobenzene to cyclohexylamine over the supported 10% Ni/carbon catalysts doped with 3‰ Rh
Source: Royal Society of Chemistry journal article supplement (doi:10.1039/c5ra27202e), 2016-01-01
Supplement: c5ra27202e1.pdf [file c5ra27202e1.pdf]

## Highly selective one-step hydrogenation of nitrobenzene to cyclohexylamine over the supported 10%Ni/carbon catalysts doped with 3%Rh

Xinhuan Lu,<sup>a,b,c</sup> Yang chen,<sup>a,c</sup> Zhenshuang Zhao,<sup>a,c</sup> Hao Deng,<sup>a,c</sup> Dan Zhou,<sup>\*,a,c</sup> Changcheng Wei,<sup>a,c</sup>  
Renfeng Nie<sup>a,c</sup> and Qinghua Xia<sup>\*,a,c</sup>

<sup>a</sup> Hubei Collaborative Innovation Center for Advanced Organic Chemical Materials, Hubei University, Wuhan 430062, P.R. China

<sup>b</sup> Hubei Key Laboratory for Processing and Application of Catalytic Materials, Huanggang Normal University, Huanggang 438000, P.R. China

<sup>c</sup> Ministry-of-Education Key Laboratory for the Synthesis and Application of Organic Functional Molecules, Hubei University, Wuhan 430062, P.R. China

**Table S1.** BET surface areas and pore volumes of different materials.

| Catalyst       | Surface area<br>(m <sup>2</sup> /g) | Total pore<br>volume (cm <sup>3</sup> /g) |
|----------------|-------------------------------------|-------------------------------------------|
| CSC            | 681.6                               | 0.32                                      |
| 1%Ni/CSC       | 679.5                               | 0.32                                      |
| 3%Ni/CSC       | 679.2                               | 0.32                                      |
| 5%Ni/CSC       | 678.1                               | 0.31                                      |
| 7%Ni/CSC       | 676.5                               | 0.31                                      |
| 10%Ni/CSC      | 675.4                               | 0.30                                      |
| 15%Ni/CSC      | 673.8                               | 0.29                                      |
| 3%Rh/CSC       | 678.9                               | 0.31                                      |
| 3%Rh-10%Ni/CSC | 676.2                               | 0.31                                      |
| AC             | 768.2                               | 0.46                                      |
| 10%Ni/AC       | 712.5                               | 0.42                                      |
| G              | 515.2                               | 0.25                                      |
| 10%Ni/G        | 508.5                               | 0.23                                      |

**Table S2** Catalytic activity of Rh-M/CSC composite catalysts.<sup>a</sup>

| Catalyst       | T<br>(°C) | Conversion<br>(mol%) | Selectivity (%) |      |        |
|----------------|-----------|----------------------|-----------------|------|--------|
|                |           |                      | AN              | CHA  | Others |
| 3%Rh-10%Ni/CSC | 140       | 100                  | 0               | 91.6 | 8.4    |
| 10%Cu/CSC      | 200       | 100                  | 97.8            | 2.2  | 0      |
| 3%Rh-10%Cu/CSC | 140       | 100                  | 40.0            | 52.9 | 7.1    |
| 10%Co/CSC      | 200       | 100                  | 98.8            | 1.2  | 0      |
| 3%Rh-10%Co/CSC | 140       | 100                  | 50.0            | 41.1 | 8.9    |
| 10%Fe/CSC      | 200       | 100                  | 100             | 0    | 0      |
| 3%Rh-10%Fe/CSC | 140       | 100                  | 72.8            | 25.3 | 1.9    |
| 10%Mo/CSC      | 200       | 100                  | 100             | 0    | 0      |
| 3%Rh-10%Mo/CSC | 140       | 100                  | 62.1            | 34.6 | 3.3    |

<sup>a</sup> Reaction conditions: Catalyst, 100 mg; NB, 1 g; LiOH, 40 mg; solvent, THF 9 g; pressure, 3.5 MPa H<sub>2</sub>; time, 6 h.

**Table S3** Effect of basic additives on the hydrogenation of NB.<sup>a</sup>

| Carrier        | Additive                       | Conversion<br>(mol%) | Selectivity (%) |      |        |
|----------------|--------------------------------|----------------------|-----------------|------|--------|
|                |                                |                      | AN              | CHA  | Others |
|                | no                             | 100                  | 0               | 53.3 | 46.7   |
|                | LiOH                           | 100                  | 0               | 91.6 | 8.4    |
| 3%Rh-10%Ni/CSC | NaNH <sub>2</sub>              | 100                  | 32.5            | 67.5 | 0      |
|                | K <sub>2</sub> CO <sub>3</sub> | 100                  | 35.6            | 64.4 | 0      |
|                | NaHCO <sub>3</sub>             | 100                  | 4.8             | 60.8 | 34.4   |

<sup>a</sup> Conditions: NB, 1 g; additive, 40 mg; solvent, THF 9 g; pressure, 3.5 MPa H<sub>2</sub>; temperature, 140 °C; time, 6 h.

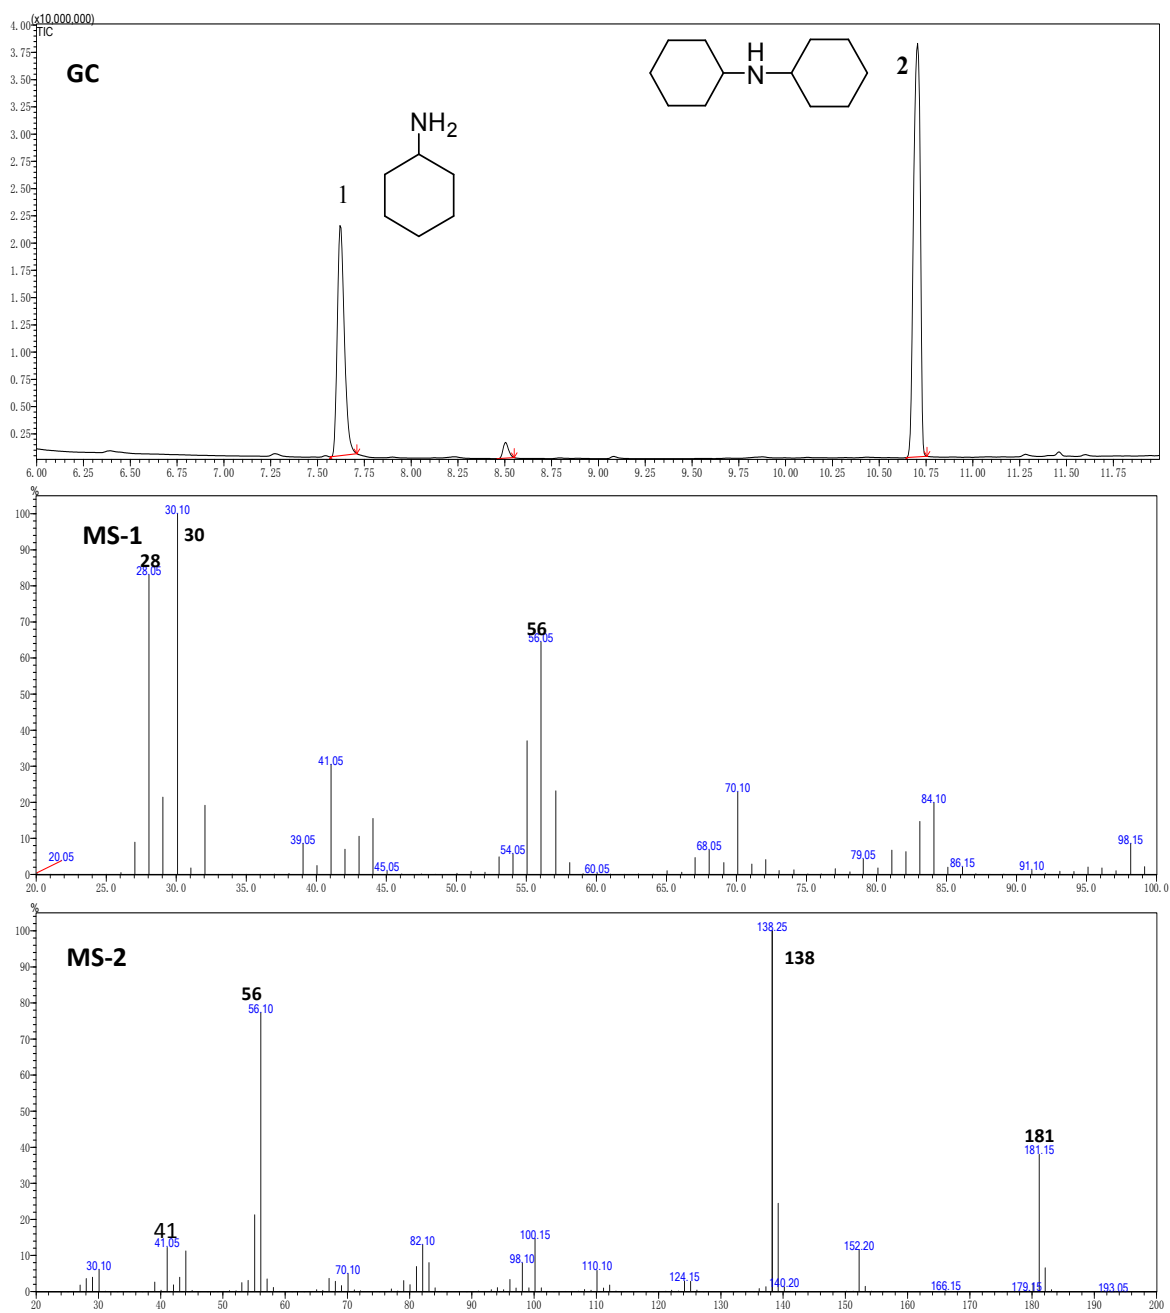

**Fig. S1** The GC-MS images of the hydrogenation products

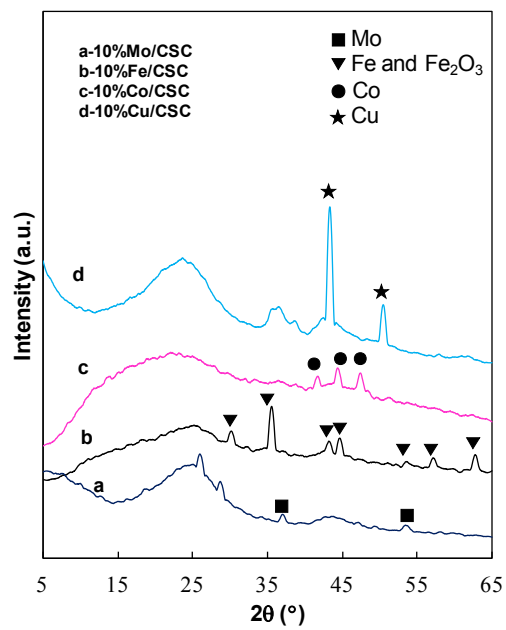

**Fig. S2.** XRD patterns of CSC supported other metal catalysts.

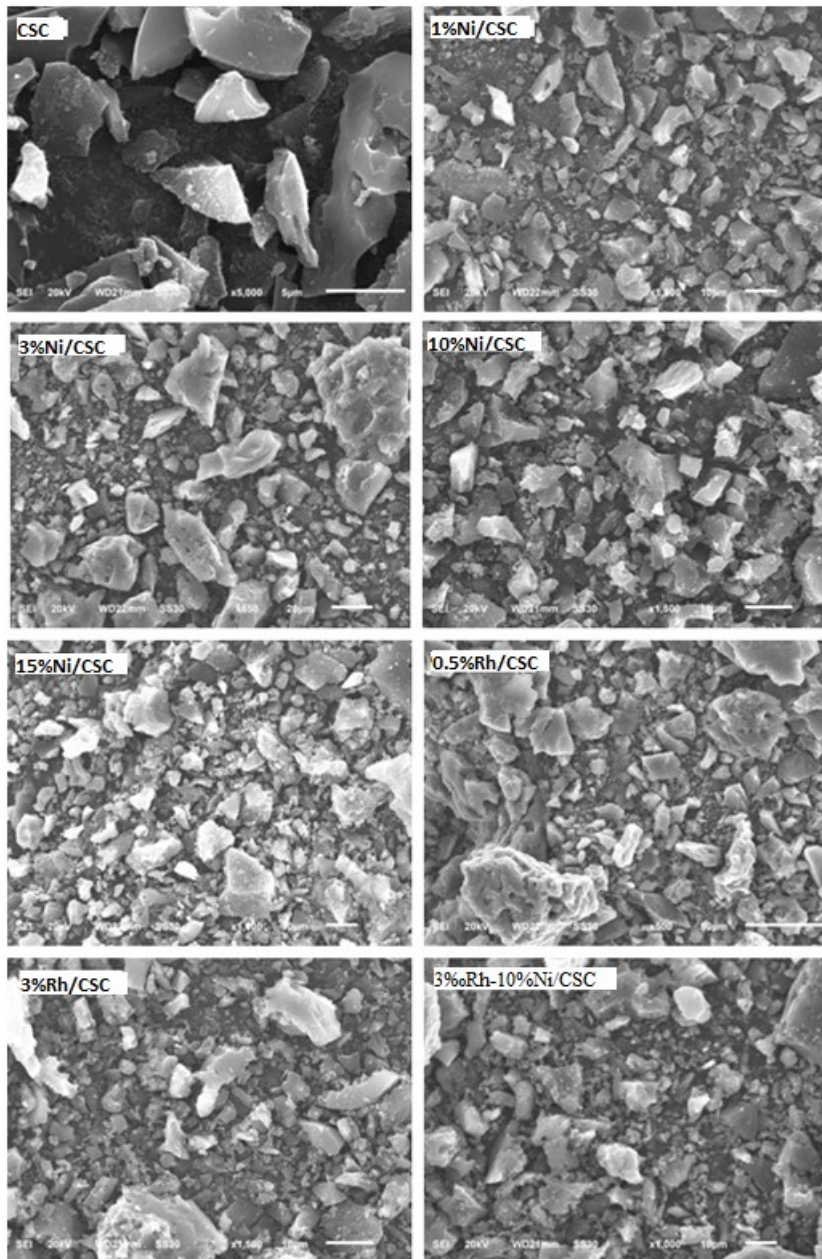

**Fig. S3.** SEM images of CSC supported Ni or Rh catalysts.

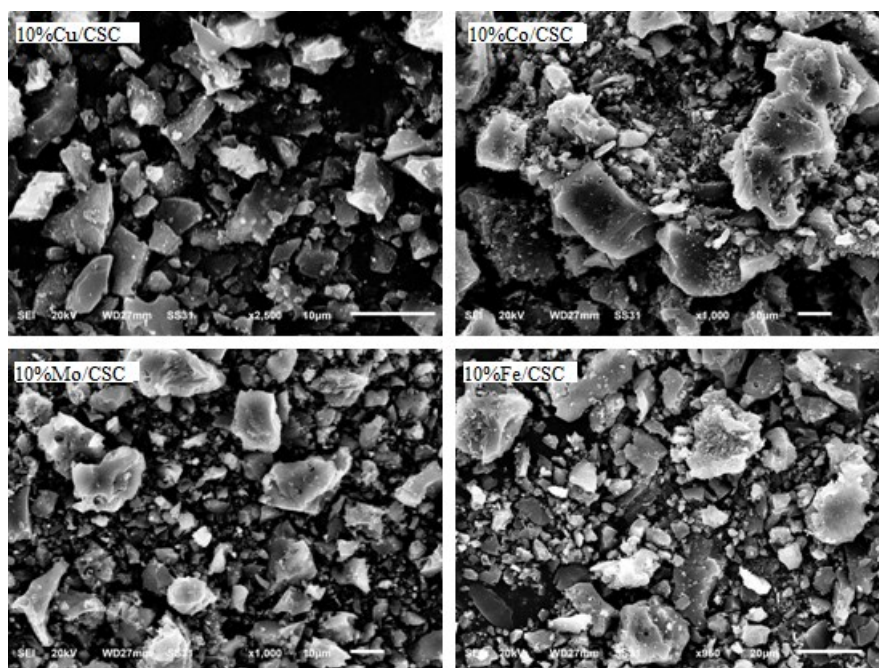

**Fig. S4.** SEM images of CSC supported other metal catalysts.

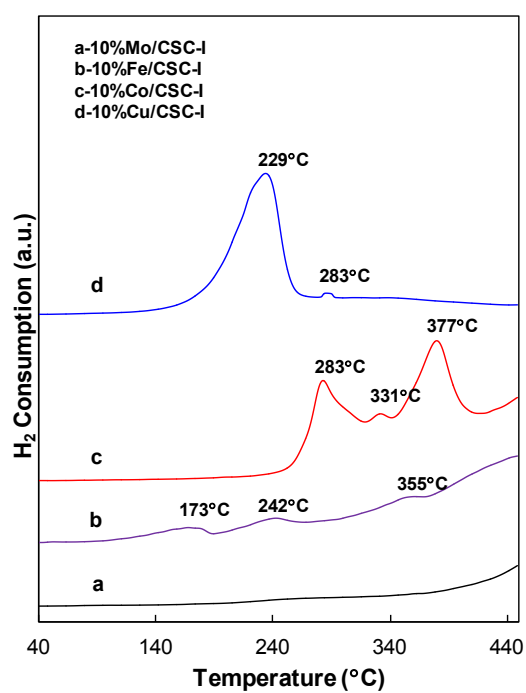

**Fig. S5.** Effect of other metals on H<sub>2</sub>-TPR profiles of 10%M/CSC.

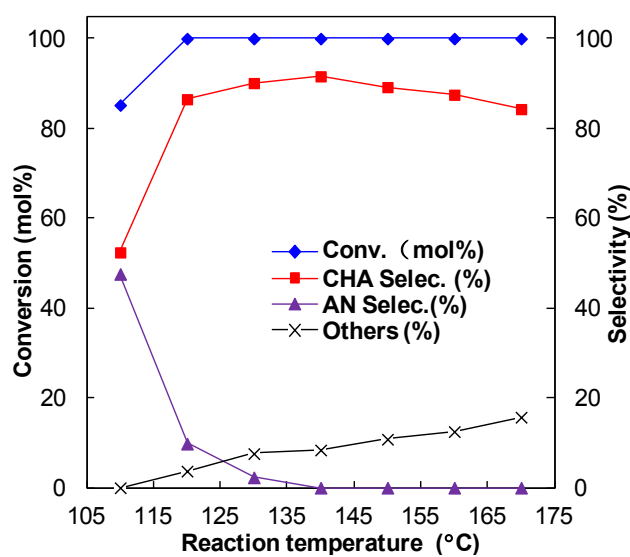

**Fig. S6** Effect of reaction temperature on the hydrogenation (Conditions: catalyst, 3%Rh-10%Ni/CSC 100 mg; NB, 1 g; LiOH, 40 mg; solvent, THF 9 g; pressure, 3.5 MPa H<sub>2</sub>; time, 6 h).

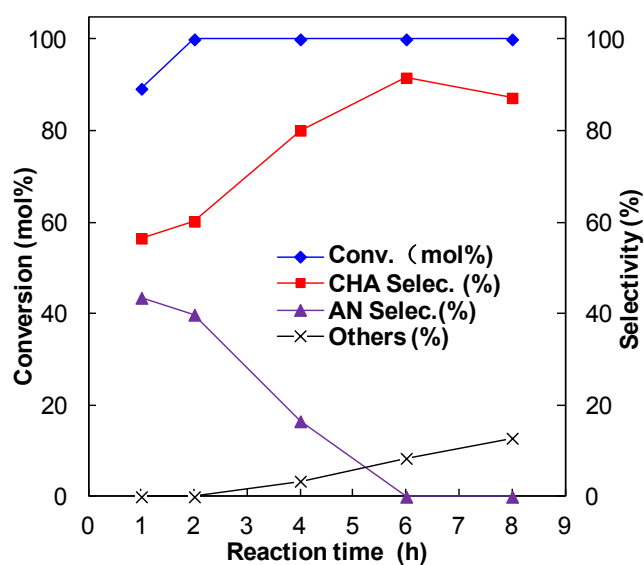

**Fig. S7** Effect of reaction time on the hydrogenation (Conditions: catalyst, 3%Rh-10%Ni/CSC 100 mg; NB, 1 g; LiOH, 40 mg; solvent, THF 9 g; pressure, 3.5 MPa H<sub>2</sub>; temperature, 140 °C).

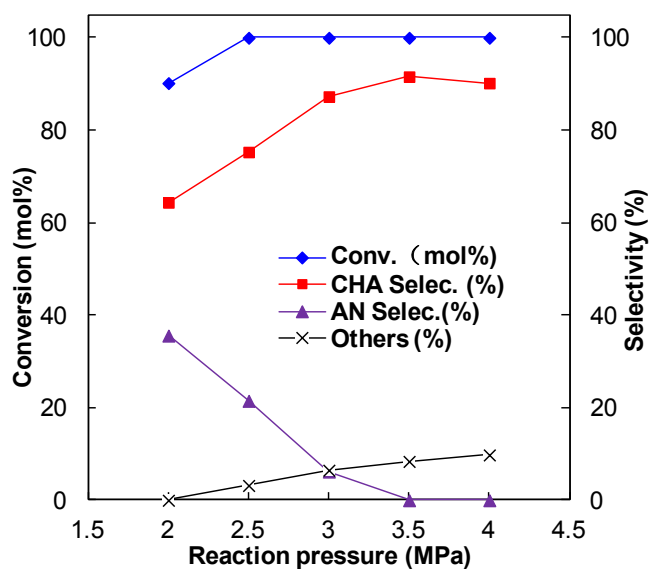

**Fig. S8** Effect of H<sub>2</sub> pressure on the hydrogenation (Conditions: catalyst, 3%Rh-10%Ni/CSC 100 mg; NB, 1g; LiOH, 40 mg; solvent, THF 9 g; temperature, 140 °C; time, 6 h).

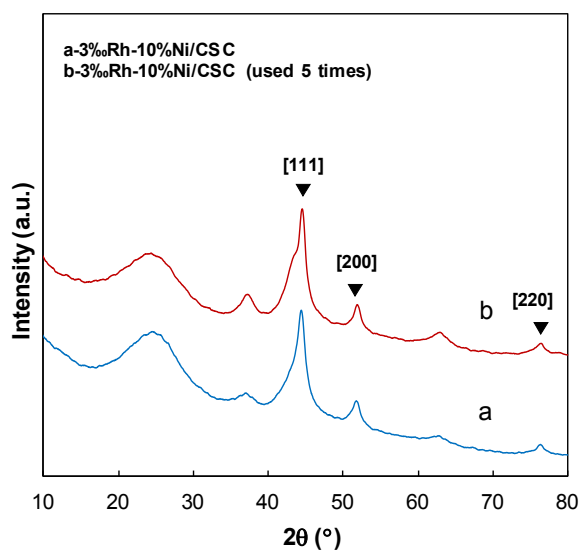

**Fig. S9** XRD patterns of 3%Rh-10%Ni/CSC (fresh and reused 5 times) catalysts.



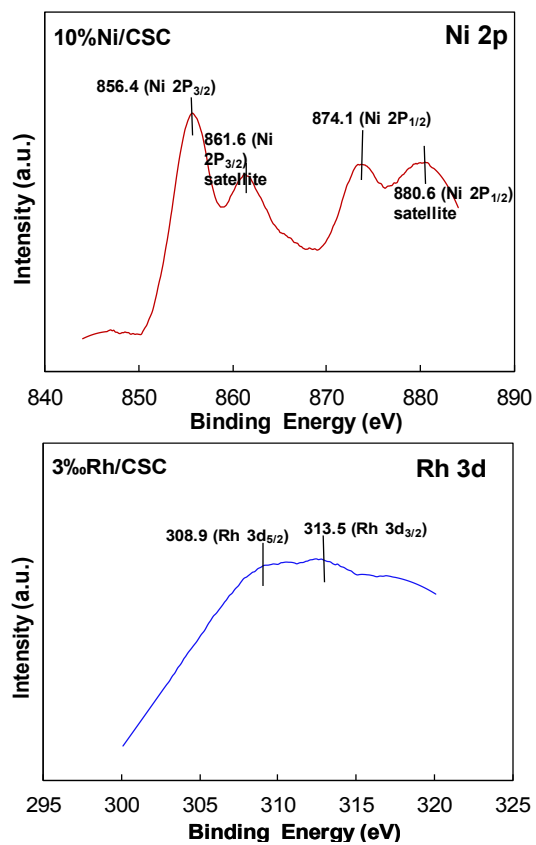

Fig. S10 XPS spectra of 3%Rh-10%Ni/CSC (reused 5 times) catalyst.

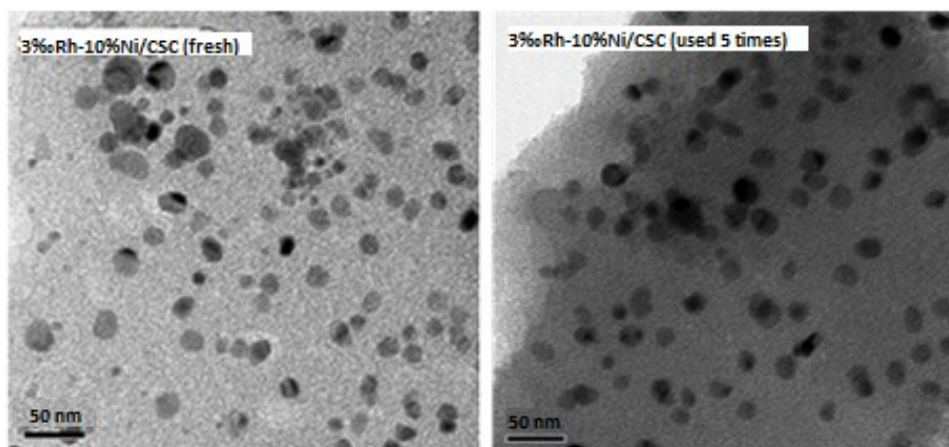

Fig. S11 TEM images of 3%Rh-10%Ni/CSC (fresh and reused 5 times) catalysts.
